# Supplementary material for: Binary Gene Expression Patterning of the Molt Cycle: The Case of Chitin Metabolism
Source: PLOS journal article supplement (doi:10.1371/journal.pone.0122602), 2015-04-28

**a**

## Molecular function

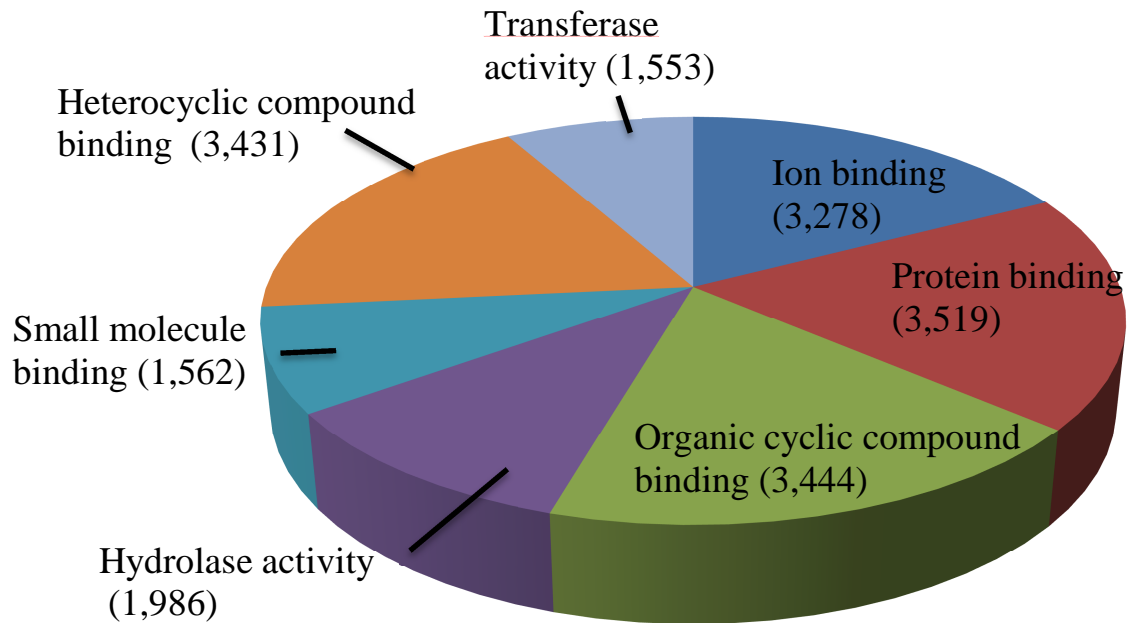

**b**

## Cellular component

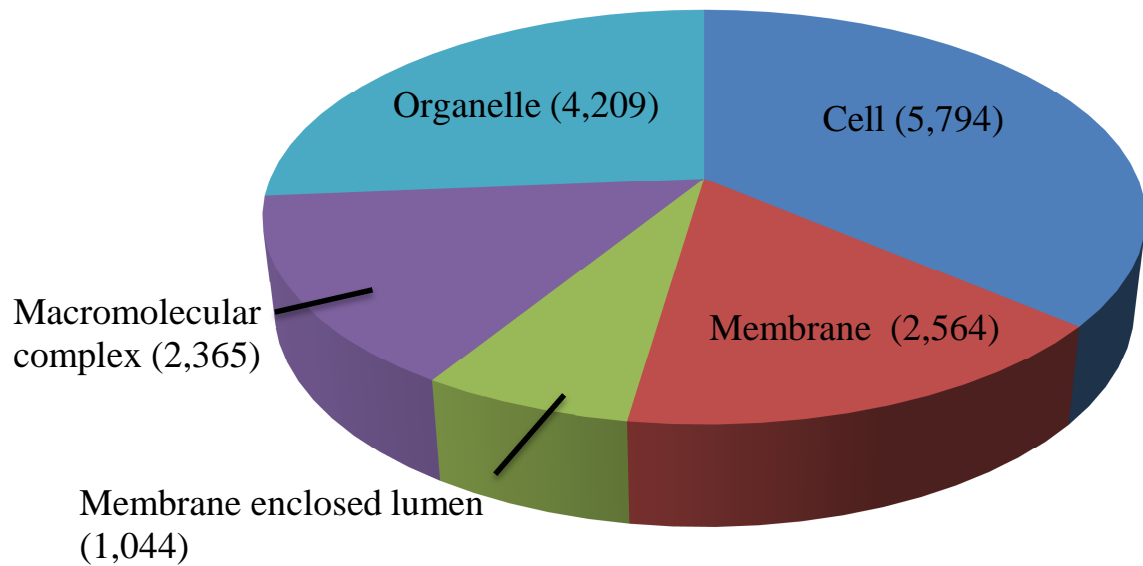

**C**

## Biological process

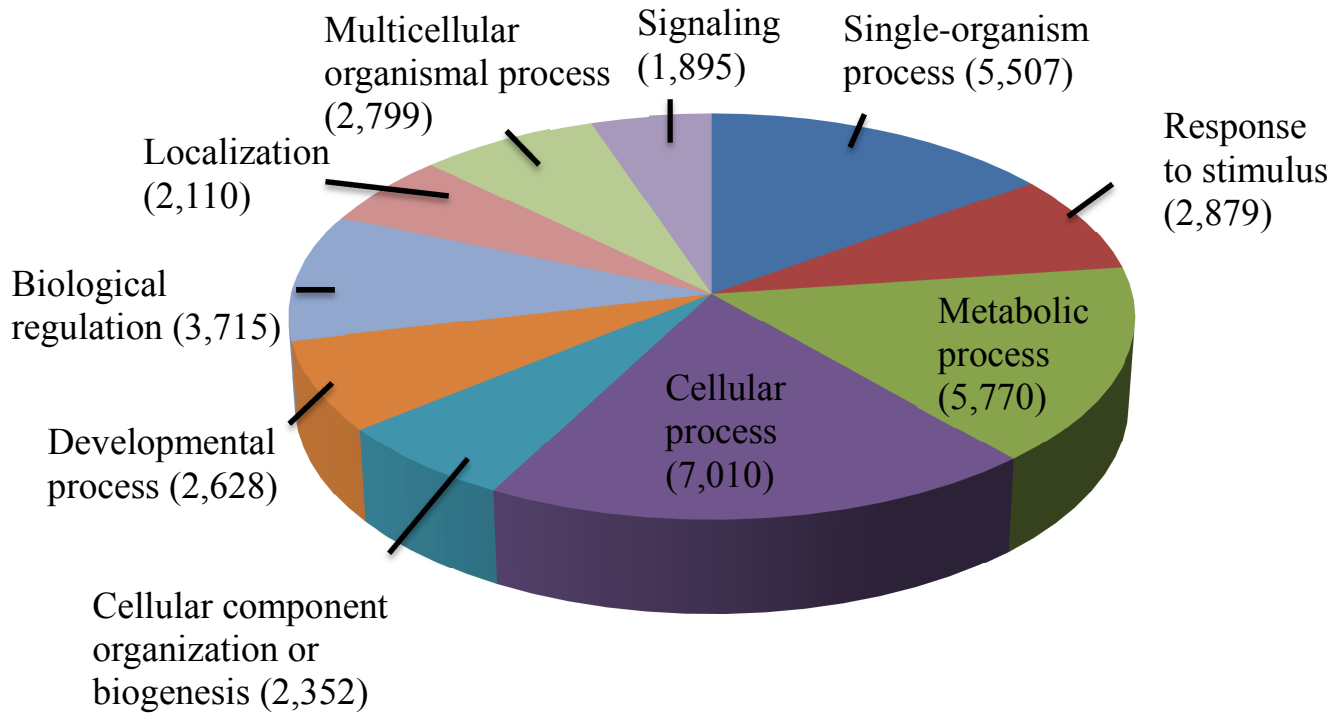

Supplement: S4 (10.1371/journal.pone.0122602.s004) [file journal.pone.0122602.s004]
